# Supplementary material
Source: PubMed Central journal article supplement (PMC9765904)
Supplement: JGMED22003321.pdf [file JGMED22003321.pdf]

## Supplementary Data

### Financial Survey

---

|                                                         |                                                                  |
|---------------------------------------------------------|------------------------------------------------------------------|
| Which type of interview process did you participate in? | <input type="radio"/> In-person<br><input type="radio"/> Virtual |
|---------------------------------------------------------|------------------------------------------------------------------|

---

|                   |                                                                    |
|-------------------|--------------------------------------------------------------------|
| I am currently a: | <input type="radio"/> UPMC PGY1<br><input type="radio"/> UPSOM MS4 |
|-------------------|--------------------------------------------------------------------|

---

|                                                                                                                       |                                                                                                                                  |
|-----------------------------------------------------------------------------------------------------------------------|----------------------------------------------------------------------------------------------------------------------------------|
| Which residency interview season did you participate in? (If you interviewed multiple years, please check the latest) | <input type="radio"/> 2019-2020 (residency start in July 2020)<br><input type="radio"/> 2020-2021 (residency start in July 2021) |
|-----------------------------------------------------------------------------------------------------------------------|----------------------------------------------------------------------------------------------------------------------------------|

---

|                                                                                                                                                                                                                                                                                                                                |                                                                                                                                                                                                                                                                                                                                                                |
|--------------------------------------------------------------------------------------------------------------------------------------------------------------------------------------------------------------------------------------------------------------------------------------------------------------------------------|----------------------------------------------------------------------------------------------------------------------------------------------------------------------------------------------------------------------------------------------------------------------------------------------------------------------------------------------------------------|
| During residency applications, did you apply for (check all that apply):<br><br>*Note, if you applied for separate transitional year or prelim year, please answer the survey to reflect both the intern and advanced year application experience. (eg. combined number of applications submitted, total cost of travel, etc.) | <input type="checkbox"/> categorical residency (PGY1 year bundled into residency)<br><input type="checkbox"/> transitional year (separate from following residency years)<br><input type="checkbox"/> preliminary medicine (separate from following residency years)<br><input type="checkbox"/> preliminary surgery (separate from following residency years) |
|--------------------------------------------------------------------------------------------------------------------------------------------------------------------------------------------------------------------------------------------------------------------------------------------------------------------------------|----------------------------------------------------------------------------------------------------------------------------------------------------------------------------------------------------------------------------------------------------------------------------------------------------------------------------------------------------------------|

---

|                                                                             |       |
|-----------------------------------------------------------------------------|-------|
| How many applications did you submit during your interview / match process? | _____ |
|-----------------------------------------------------------------------------|-------|

---

|                                                                        |       |
|------------------------------------------------------------------------|-------|
| How many specialties did you apply to (not including prelim programs)? | _____ |
|------------------------------------------------------------------------|-------|

---

|                                             |       |
|---------------------------------------------|-------|
| How many interview invites did you receive? | _____ |
|---------------------------------------------|-------|

---

|                                            |       |
|--------------------------------------------|-------|
| How many interview invites did you accept? | _____ |
|--------------------------------------------|-------|

---

|                                                                            |                                                                                                                                                                        |
|----------------------------------------------------------------------------|------------------------------------------------------------------------------------------------------------------------------------------------------------------------|
| Did you select programs to interview at due to a specific geographic area? | <input type="radio"/> 1 state + surrounding state/s<br><input type="radio"/> US regions (eg. east coast, west coast, mid-west)<br><input type="radio"/> No limitations |
|----------------------------------------------------------------------------|------------------------------------------------------------------------------------------------------------------------------------------------------------------------|

---

|                                                                                            |                                                                                                                                                                                                                                  |
|--------------------------------------------------------------------------------------------|----------------------------------------------------------------------------------------------------------------------------------------------------------------------------------------------------------------------------------|
| In-person interviews caused/would have caused me to apply to a narrower geographic region. | <input type="radio"/> Strongly disagree (applied broadly)<br><input type="radio"/> Disagree<br><input type="radio"/> Neither<br><input type="radio"/> Agree<br><input type="radio"/> Strongly agree (narrower geographic region) |
|--------------------------------------------------------------------------------------------|----------------------------------------------------------------------------------------------------------------------------------------------------------------------------------------------------------------------------------|

---

Compared to an in-person interview, a virtual interview is \_\_\_\_\_.

Less stressful  
 Equally stressful  
 More stressful

---

If you were stressed / anxious about interviews, which part was the most stressful for you? (Check all that apply)

Being able to communicate your personality  
 Being able to see the facilities  
 Getting a feel for the residency program  
 Getting a feel for the city  
 Timing of multiple interviews  
 Logistics of travel or setting up virtual interview  
 WiFi connection / technology  
 Cost  
 Other

---

What part of the interview was the most stressful for you? \_\_\_\_\_

---

Did you ever have to interview with multiple residency programs in the same day?

Yes  
 No

---

How many days did you have to interview with multiple residency programs? \_\_\_\_\_

---

Did you ever arrive late or miss a part of the interview or pre-interview resident social event?

Yes  
 No

---

How many events did you miss? \_\_\_\_\_

---

The interview day significantly altered your pre-interview rank list

Strongly disagree (no change)  
 Disagree  
 Neither  
 Agree  
 Strongly agree (major changes)

---

How much estimated student loans do you currently have? (including undergrad, med school, etc)

None  
 \$0-50K  
 \$51-100K  
 \$101-150K  
 \$151-250K  
 > \$251K  
 prefer not to answer

---

What is your average/estimated study loan interest rate? Leave empty if you prefer not to answer \_\_\_\_\_

---

Did you take out additional loans for interviews?

No  
 Yes, \$1 to 2500  
 Yes, \$2,501-5,000  
 Yes, \$5,001-\$7,500  
 Yes, \$7,501-\$10,000  
 Yes, >\$10,000  
 prefer not to answer

---

How much did you spend on application fees? \_\_\_\_\_

---

How much did you spend on flights/travel for interviews? \_\_\_\_\_

(Please estimate as accurately as possible. It's okay to put \$0 if you did virtual.)

---

How much did you spend on hotels/lodging for interviews? \_\_\_\_\_

(Please estimate as accurately as possible. It's okay to put \$0 if you did virtual.)

---

Did you have additional costs not mentioned in previous three questions? (eg. camera set up, lights, etc.)

- Yes  
 No

---

What was the additional cost for? \_\_\_\_\_

---

What was the total amount in additional costs? \_\_\_\_\_

---

Did you couples match?

- Yes  
 No

---

What do you consider your "home" state?

- International
- US territories (Samoa, Guam, Northern Mariana Islands, Puerto Rico, etc)
- Alabama
- Alaska
- Arizona
- Arkansas
- California
- Colorado
- Connecticut
- Delaware
- Florida
- Georgia
- Hawaii
- Idaho
- Illinois
- Indiana
- Iowa
- Kansas
- Kentucky
- Louisiana
- Maine
- Maryland
- Massachusetts
- Michigan
- Minnesota
- Mississippi
- Missouri
- Montana
- Nebraska
- Nevada
- New Hampshire
- New Jersey
- New Mexico
- New York
- North Carolina
- North Dakota
- Ohio
- Oklahoma
- Oregon
- Pennsylvania
- Rhode Island
- South Carolina
- South Dakota
- Tennessee
- Texas
- Utah
- Vermont
- Virginia
- Washington
- West Virginia
- Wisconsin
- Wyoming

---

If international, which country?

---

---

In what state did you do your undergraduate studies (if more than one, choose where you spent the most time).

- International
- US territories (Samoa, Guam, Northern Mariana Islands, Puerto Rico, etc)
- Alabama
- Alaska
- Arizona
- Arkansas
- California
- Colorado
- Connecticut
- Delaware
- Florida
- Georgia
- Hawaii
- Idaho
- Illinois
- Indiana
- Iowa
- Kansas
- Kentucky
- Louisiana
- Maine
- Maryland
- Massachusetts
- Michigan
- Minnesota
- Mississippi
- Missouri
- Montana
- Nebraska
- Nevada
- New Hampshire
- New Jersey
- New Mexico
- New York
- North Carolina
- North Dakota
- Ohio
- Oklahoma
- Oregon
- Pennsylvania
- Rhode Island
- South Carolina
- South Dakota
- Tennessee
- Texas
- Utah
- Vermont
- Virginia
- Washington
- West Virginia
- Wisconsin
- Wyoming

---

If international, which country?

---

---

In what state did you do your medical school studies (if more than one, choose where you spent the most time).

- International
- US territories (Samoa, Guam, Northern Mariana Islands, Puerto Rico, etc)
- Alabama
- Alaska
- Arizona
- Arkansas
- California
- Colorado
- Connecticut
- Delaware
- Florida
- Georgia
- Hawaii
- Idaho
- Illinois
- Indiana
- Iowa
- Kansas
- Kentucky
- Louisiana
- Maine
- Maryland
- Massachusetts
- Michigan
- Minnesota
- Mississippi
- Missouri
- Montana
- Nebraska
- Nevada
- New Hampshire
- New Jersey
- New Mexico
- New York
- North Carolina
- North Dakota
- Ohio
- Oklahoma
- Oregon
- Pennsylvania
- Rhode Island
- South Carolina
- South Dakota
- Tennessee
- Texas
- Utah
- Vermont
- Virginia
- Washington
- West Virginia
- Wisconsin
- Wyoming

---

If international, which country?

---

## Program Perception Survey

---

|                     |                                      |                                    |                                                    |
|---------------------|--------------------------------------|------------------------------------|----------------------------------------------------|
| My interviews were: | <input type="radio"/> In person only | <input type="radio"/> Virtual only | <input type="radio"/> Mix of virtual and in person |
|---------------------|--------------------------------------|------------------------------------|----------------------------------------------------|

---

|                                                                                                           |                                         |                                |                               |                             |                                      |
|-----------------------------------------------------------------------------------------------------------|-----------------------------------------|--------------------------------|-------------------------------|-----------------------------|--------------------------------------|
| I was able to get a good impression of the residency camaraderie and culture during my interview process. | <input type="radio"/> Strongly Disagree | <input type="radio"/> Disagree | <input type="radio"/> Neutral | <input type="radio"/> Agree | <input type="radio"/> Strongly Agree |
|-----------------------------------------------------------------------------------------------------------|-----------------------------------------|--------------------------------|-------------------------------|-----------------------------|--------------------------------------|

---

|                                                                                                                           |                                         |                                |                               |                             |                                      |
|---------------------------------------------------------------------------------------------------------------------------|-----------------------------------------|--------------------------------|-------------------------------|-----------------------------|--------------------------------------|
| I was able to gain an understanding of what living in the city the residency program I was interviewing at would be like. | <input type="radio"/> Strongly Disagree | <input type="radio"/> Disagree | <input type="radio"/> Neutral | <input type="radio"/> Agree | <input type="radio"/> Strongly Agree |
|---------------------------------------------------------------------------------------------------------------------------|-----------------------------------------|--------------------------------|-------------------------------|-----------------------------|--------------------------------------|

---

|                                                                               |                                         |                                |                               |                             |                                      |
|-------------------------------------------------------------------------------|-----------------------------------------|--------------------------------|-------------------------------|-----------------------------|--------------------------------------|
| I got a feel for what daily life would be like at the programs I interviewed. | <input type="radio"/> Strongly Disagree | <input type="radio"/> Disagree | <input type="radio"/> Neutral | <input type="radio"/> Agree | <input type="radio"/> Strongly Agree |
|-------------------------------------------------------------------------------|-----------------------------------------|--------------------------------|-------------------------------|-----------------------------|--------------------------------------|

---

|                                                                                                                                             |                                         |                                |                               |                             |                                      |
|---------------------------------------------------------------------------------------------------------------------------------------------|-----------------------------------------|--------------------------------|-------------------------------|-----------------------------|--------------------------------------|
| I felt that I gained a good understanding of additional opportunities at the program for residents (research, advocacy, moonlighting, etc.) | <input type="radio"/> Strongly Disagree | <input type="radio"/> Disagree | <input type="radio"/> Neutral | <input type="radio"/> Agree | <input type="radio"/> Strongly Agree |
|---------------------------------------------------------------------------------------------------------------------------------------------|-----------------------------------------|--------------------------------|-------------------------------|-----------------------------|--------------------------------------|

---

|                                                                          |                                         |                                |                               |                             |                                      |
|--------------------------------------------------------------------------|-----------------------------------------|--------------------------------|-------------------------------|-----------------------------|--------------------------------------|
| The pre-interview dinner/social was instrumental in making my rank list. | <input type="radio"/> Strongly Disagree | <input type="radio"/> Disagree | <input type="radio"/> Neutral | <input type="radio"/> Agree | <input type="radio"/> Strongly Agree |
|--------------------------------------------------------------------------|-----------------------------------------|--------------------------------|-------------------------------|-----------------------------|--------------------------------------|

---

|                                                                                            |                                         |                                |                               |                             |                                      |
|--------------------------------------------------------------------------------------------|-----------------------------------------|--------------------------------|-------------------------------|-----------------------------|--------------------------------------|
| The social media presence of the residency affected my ability to learn about the program. | <input type="radio"/> Strongly Disagree | <input type="radio"/> Disagree | <input type="radio"/> Neutral | <input type="radio"/> Agree | <input type="radio"/> Strongly Agree |
|--------------------------------------------------------------------------------------------|-----------------------------------------|--------------------------------|-------------------------------|-----------------------------|--------------------------------------|

---

|                                                                                                  |                                         |                                |                               |                             |                                      |
|--------------------------------------------------------------------------------------------------|-----------------------------------------|--------------------------------|-------------------------------|-----------------------------|--------------------------------------|
| Educational and informational content of their website was crucial in learning about the program | <input type="radio"/> Strongly Disagree | <input type="radio"/> Disagree | <input type="radio"/> Neutral | <input type="radio"/> Agree | <input type="radio"/> Strongly Agree |
|--------------------------------------------------------------------------------------------------|-----------------------------------------|--------------------------------|-------------------------------|-----------------------------|--------------------------------------|

---

|                                                                                       |                                         |                                |                               |                             |                                      |
|---------------------------------------------------------------------------------------|-----------------------------------------|--------------------------------|-------------------------------|-----------------------------|--------------------------------------|
| I feel that I was able to make a positive impression with faculty during my interview | <input type="radio"/> Strongly Disagree | <input type="radio"/> Disagree | <input type="radio"/> Neutral | <input type="radio"/> Agree | <input type="radio"/> Strongly Agree |
|---------------------------------------------------------------------------------------|-----------------------------------------|--------------------------------|-------------------------------|-----------------------------|--------------------------------------|

---

|                                                                                                     |                                         |                                |                               |                             |                                      |
|-----------------------------------------------------------------------------------------------------|-----------------------------------------|--------------------------------|-------------------------------|-----------------------------|--------------------------------------|
| I feel that I was able to develop rapport with faculty and residents during my interview experience | <input type="radio"/> Strongly Disagree | <input type="radio"/> Disagree | <input type="radio"/> Neutral | <input type="radio"/> Agree | <input type="radio"/> Strongly Agree |
|-----------------------------------------------------------------------------------------------------|-----------------------------------------|--------------------------------|-------------------------------|-----------------------------|--------------------------------------|

---

|                                                              |                                         |                                |                               |                             |                                      |
|--------------------------------------------------------------|-----------------------------------------|--------------------------------|-------------------------------|-----------------------------|--------------------------------------|
| The interview process greatly influenced my final rank list. | <input type="radio"/> Strongly Disagree | <input type="radio"/> Disagree | <input type="radio"/> Neutral | <input type="radio"/> Agree | <input type="radio"/> Strongly Agree |
|--------------------------------------------------------------|-----------------------------------------|--------------------------------|-------------------------------|-----------------------------|--------------------------------------|

---

|                                                                                               |                                         |                                |                               |                             |                                      |
|-----------------------------------------------------------------------------------------------|-----------------------------------------|--------------------------------|-------------------------------|-----------------------------|--------------------------------------|
| I feel that an open house separate from my interviews would have helped me make my rank list. | <input type="radio"/> Strongly Disagree | <input type="radio"/> Disagree | <input type="radio"/> Neutral | <input type="radio"/> Agree | <input type="radio"/> Strongly Agree |
|-----------------------------------------------------------------------------------------------|-----------------------------------------|--------------------------------|-------------------------------|-----------------------------|--------------------------------------|

---

|                                                                                                                                |                                         |                                |                               |                             |                                      |
|--------------------------------------------------------------------------------------------------------------------------------|-----------------------------------------|--------------------------------|-------------------------------|-----------------------------|--------------------------------------|
| I feel the interview process was a good representation of what the residency program actually turned out to be after arriving. | <input type="radio"/> Strongly Disagree | <input type="radio"/> Disagree | <input type="radio"/> Neutral | <input type="radio"/> Agree | <input type="radio"/> Strongly Agree |
|--------------------------------------------------------------------------------------------------------------------------------|-----------------------------------------|--------------------------------|-------------------------------|-----------------------------|--------------------------------------|

---

|                                             |                                         |                                |                               |                             |                                      |
|---------------------------------------------|-----------------------------------------|--------------------------------|-------------------------------|-----------------------------|--------------------------------------|
| I am satisfied with my choice of residency. | <input type="radio"/> Strongly Disagree | <input type="radio"/> Disagree | <input type="radio"/> Neutral | <input type="radio"/> Agree | <input type="radio"/> Strongly Agree |
|---------------------------------------------|-----------------------------------------|--------------------------------|-------------------------------|-----------------------------|--------------------------------------|
